# Supplementary material for: Self-made fenestrated modified endograft for urgent an Aortic Arch Aneurysm: Case Report
Source: Research Square preprint supplement (doi:10.21203/rs.3.rs-1780518/v1), 2022-06-30
Supplement: Supplementary file 1 [file c0c42b52af71e8a0fd996e37.docx]

**Table 1.** Characteristics of the Patient.

| *Patient Characteristics* | |
| --- | --- |
| Age, y | 84 |
| Hypertensiona | 1 |
| Diabetes | 0 |
| Dyslipidemia | 1 |
| Smoking | 0 |
| COPD | 1 |
| CAD | 1 |
| LV ejection fraction <40% | 0 |
| Prior aortic surgery | 0 |
| Renal insufficiency | 0 |
| eGFR, mL/min/1.73 m2 | 103 |
| ASA score | 2 |

Abbreviations: ASA, American Society of Anesthesiologists; CAD, coronary artery disease; COPD, chronic obstructive pulmonary disease; DAP, dose area product; eGFR, estimated glomerular filtration rate; LV, left ventricular; aSystolic pressure >140 mm Hg or treatment.
